# Supplementary material for: A Linguistically Informed Autosomal STR Survey of Human Populations Residing in the Greater Himalayan Region
Source: PubMed Central journal article supplement (PMC3948894; doi:10.1371/journal.pone.0091534), 2014-03-10

Figure S4

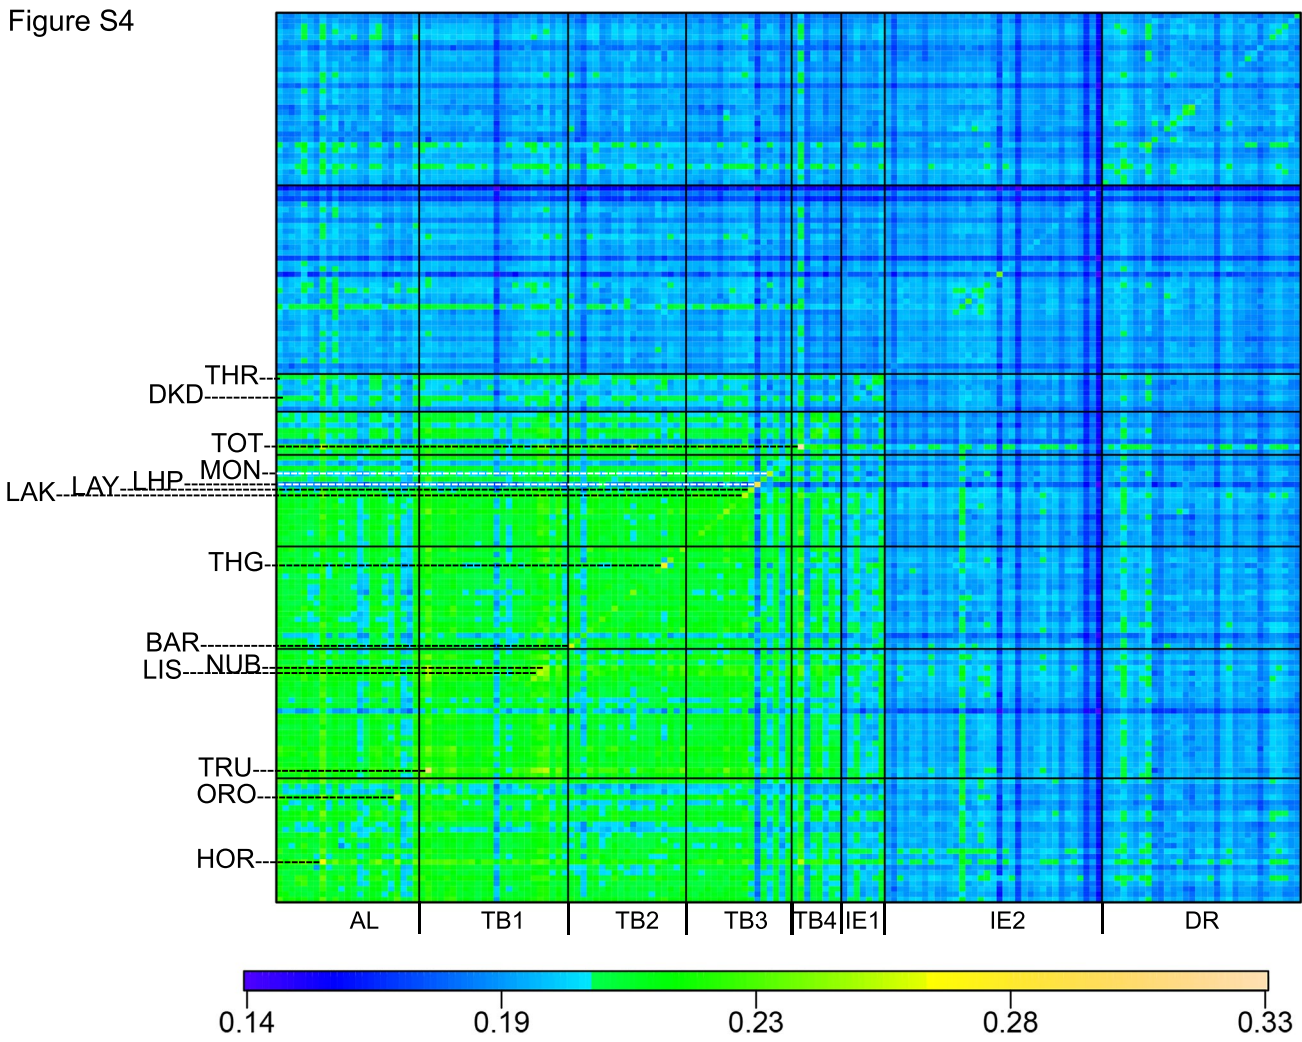

Supplement: pone.0091534.s004.pdf [file pone.0091534.s004.pdf]
